# Supplementary material for: Role of the renal sympathetic nerve in renal glucose metabolism during the development of type 2 diabetes in rats
Source: PubMed Central journal article supplement (PMC4630257; doi:10.1007/s00125-015-3771-9), 2015-10-08
Supplement: 125_2015_3771_MOESM4_ESM.pdf [file 125_2015_3771_MOESM4_ESM.pdf]

**ESM Fig. 2.**

**a-i**

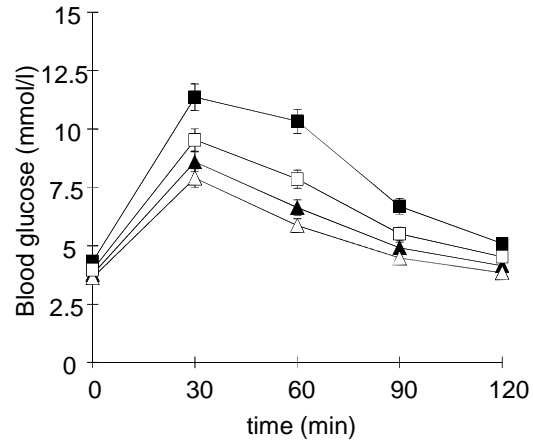

**a-ii**

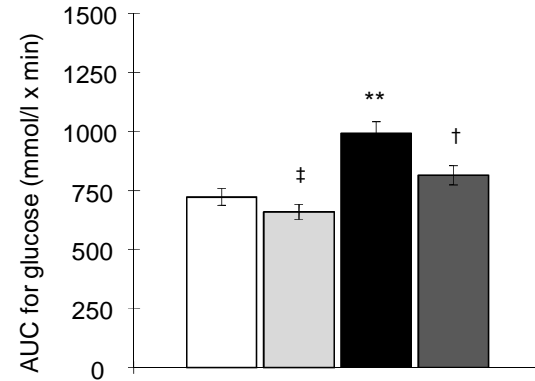

**b-i**

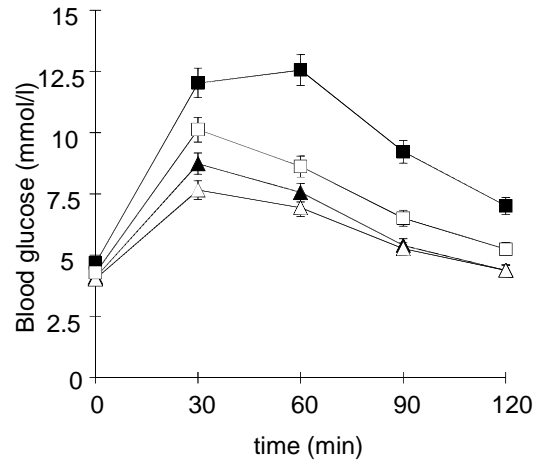

**b-ii**

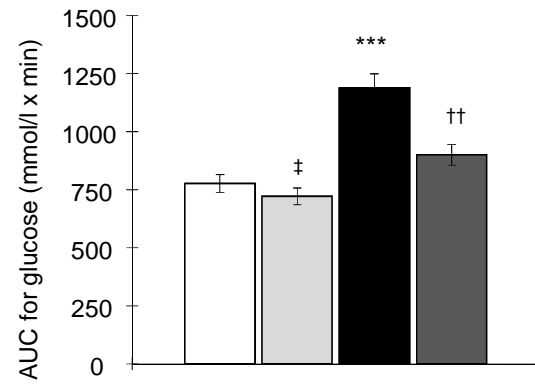

**c-i**

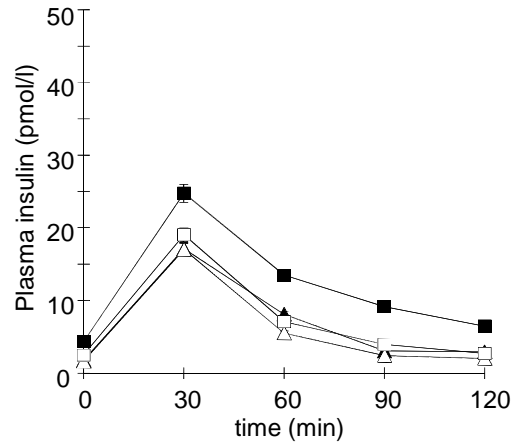

**c-ii**

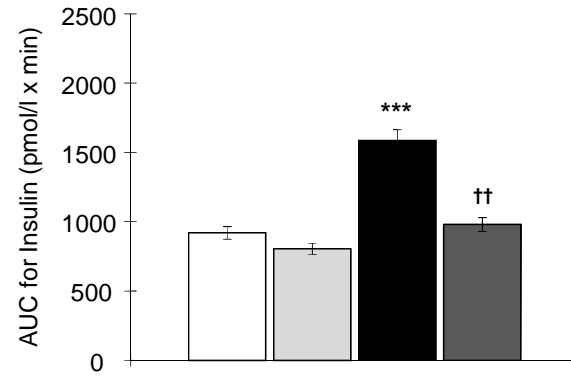

**d-i**

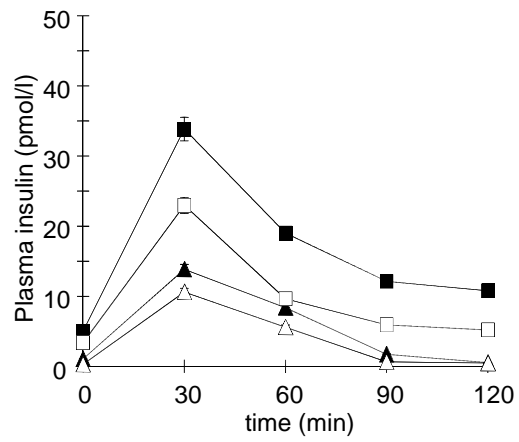

**d-ii**

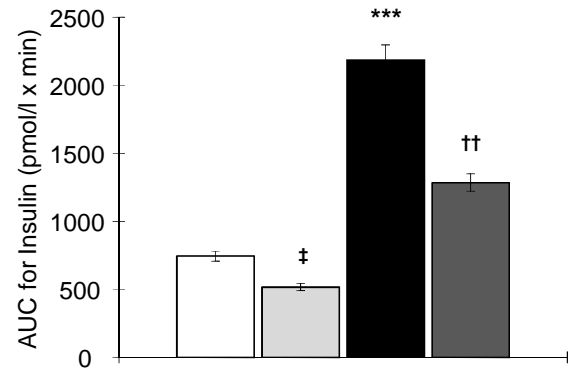

**ESM Fig. 2.** Blood glucose and insulin levels, and their respective area under the curve (AUC), during the oral glucose tolerance test (OGTT). **a, b**, Blood glucose levels and their respective AUC during the OGTT at 14 (**a-i, a-ii**) and 20 (**b-i,b-ii**) weeks of age (8 and 14 weeks after RDX, respectively). Compared with LETO rats the OLETF rats showed higher glucose levels and associated AUC after oral administration of glucose, which were attenuated by RDX. **c, d**, Plasma insulin levels and associated AUC during OGTT at 14 (**c-i, c-ii**) and 20 (**d-i, d-ii**) weeks of age (8 and 14 weeks after RDX, respectively). OLETF rats have substantially greater plasma insulin levels and associated AUC after the oral administration of glucose compared with LETO rats, which was suppressed by RDX. \*\* $p < 0.01$ , \*\*\* $p < 0.005$  LETO vs. OLETF; † $p < 0.05$ , †† $p < 0.01$  OLETF vs. OLETF+RDX; ‡ $p < 0.05$  LETO vs. LETO+RDX. White bars, black triangles represent LETO group. Black bars, black squares represent OLETF group. Light grey bar, white triangles represent LETO+RDX. Dark grey bar, white squares represent OLETF+RDX.
