# Supplementary material for: Role of the renal sympathetic nerve in renal glucose metabolism during the development of type 2 diabetes in rats
Source: PubMed Central journal article supplement (PMC4630257; doi:10.1007/s00125-015-3771-9), 2015-10-08
Supplement: 125_2015_3771_MOESM6_ESM.pdf [file 125_2015_3771_MOESM6_ESM.pdf]

**ESM Fig. 4.**

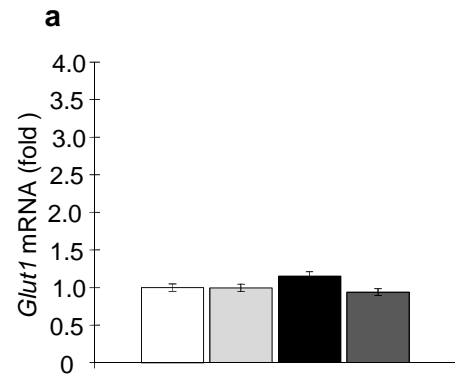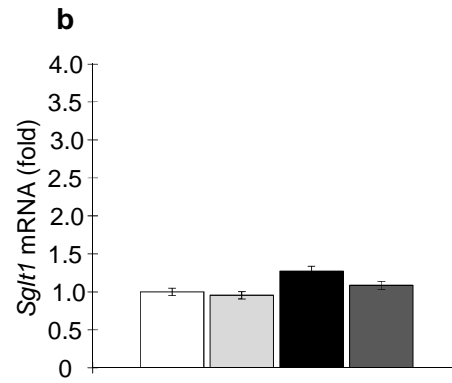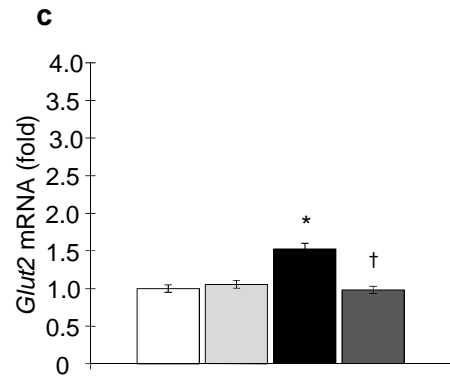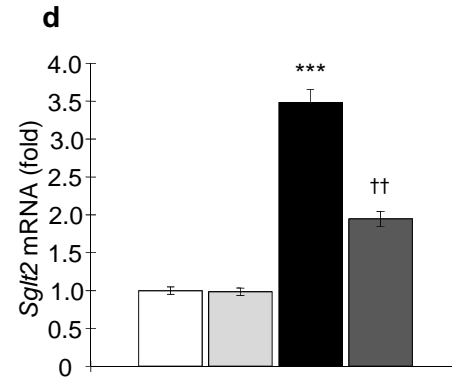

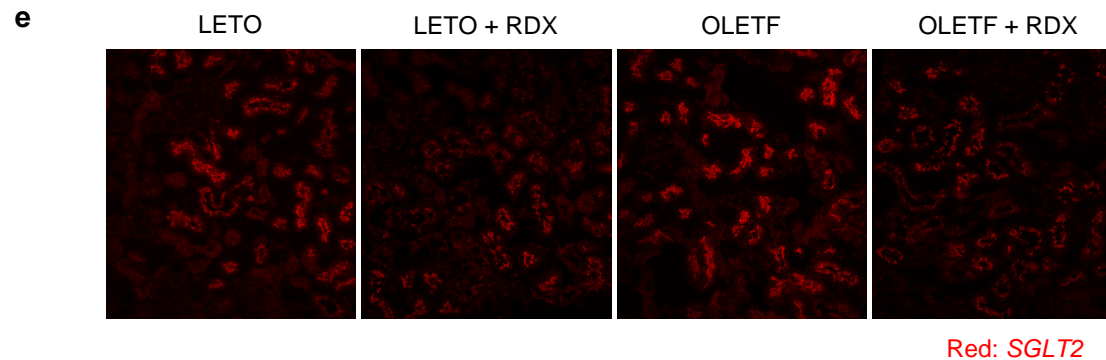

**ESM Fig. 4.** Expression of glucose transporters in the kidney. **a, b**, Renal cortical tissue *Glut1* (**a**) and *Sgl1* (**b**) mRNA levels were similar between treatment groups. However, *Glut2* (**c**) mRNA expression shows significant upregulation in OETF rats compared with LETO rats. Furthermore, *Sgl2* (**d**) mRNA levels were markedly upregulated in renal cortical tissue of OETF rats compared with LETO rats. The mRNA upregulation in OETF rats was suppressed by RDX. Real-time reverse transcription polymerase chain reaction (RT-PCR) data are expressed as fold-changes compared with LETO rats after normalization for the expression of  $\beta$ -actin. **e**, Immunofluorescence micrographs demonstrating staining with an anti-SGLT2 antibody (red fluorescence) (original magnification,  $\times 200$ ). The staining intensity is weaker in OETF+RDX than OETF rats. \* $p < 0.05$ , \*\*\* $p < 0.005$  LETO vs. OETF; † $p < 0.05$ , †† $p < 0.01$  OETF vs. OETF+RDX. White bars represent LETO group. Black bars represent OETF group. Light grey bar represent LETO+RDX. Dark grey bar represent OETF+RDX.
