# Supplementary material for: Role of the renal sympathetic nerve in renal glucose metabolism during the development of type 2 diabetes in rats
Source: PubMed Central journal article supplement (PMC4630257; doi:10.1007/s00125-015-3771-9), 2015-10-08
Supplement: 125_2015_3771_MOESM7_ESM.pdf [file 125_2015_3771_MOESM7_ESM.pdf]

ESM Fig. 5.

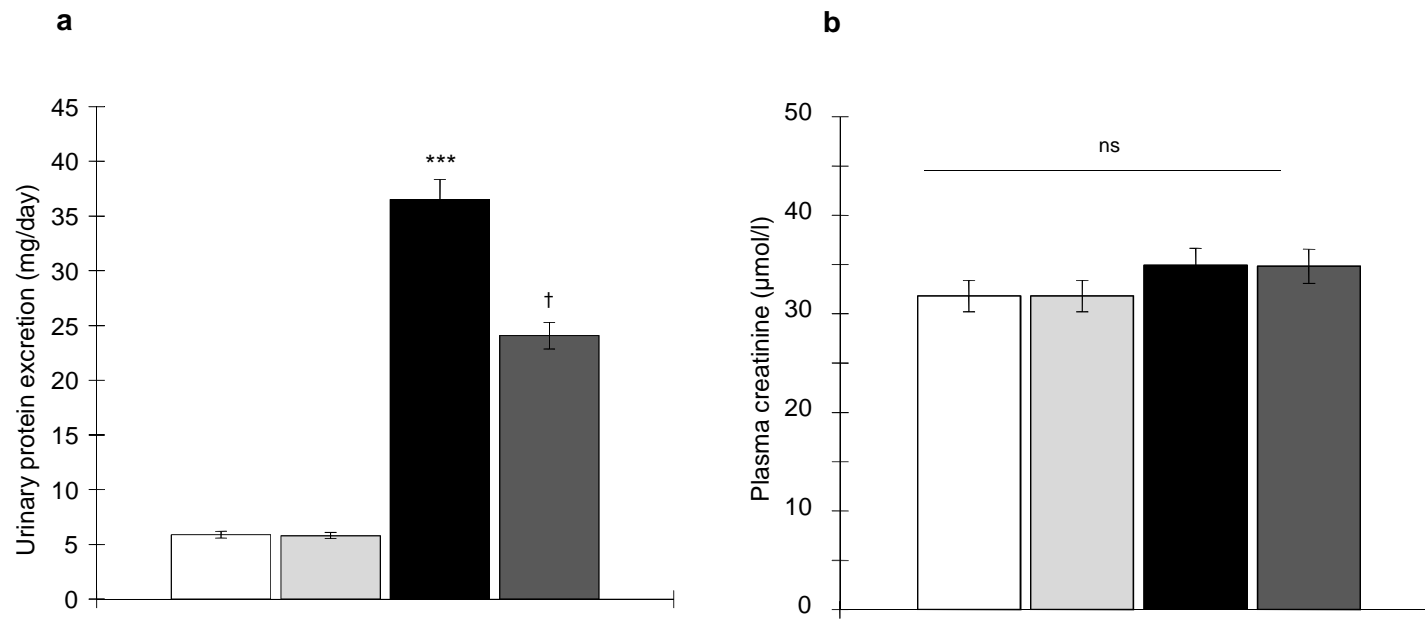

**c**

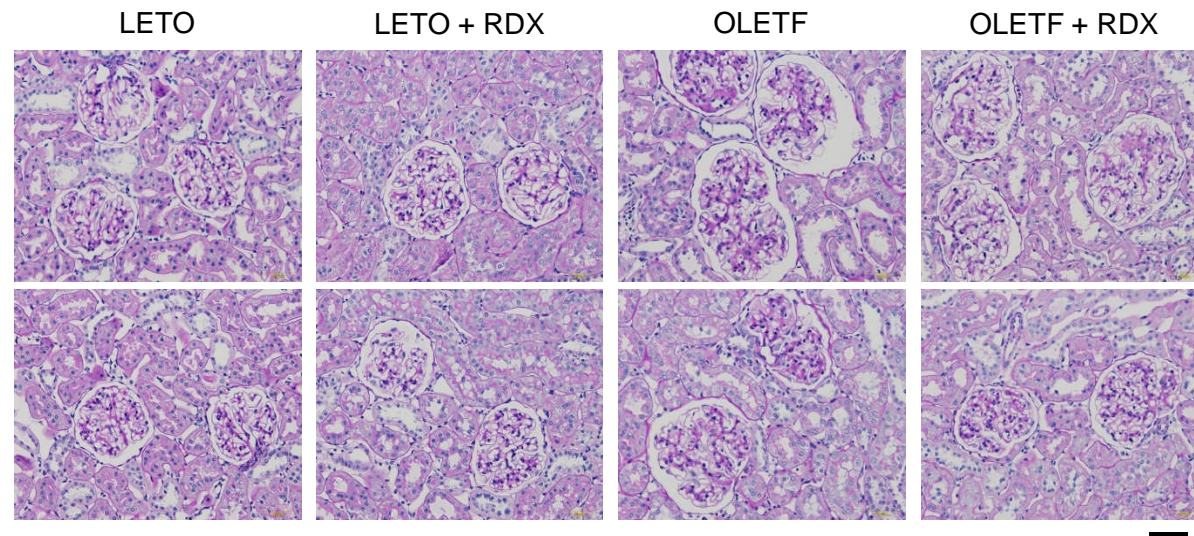

**d**

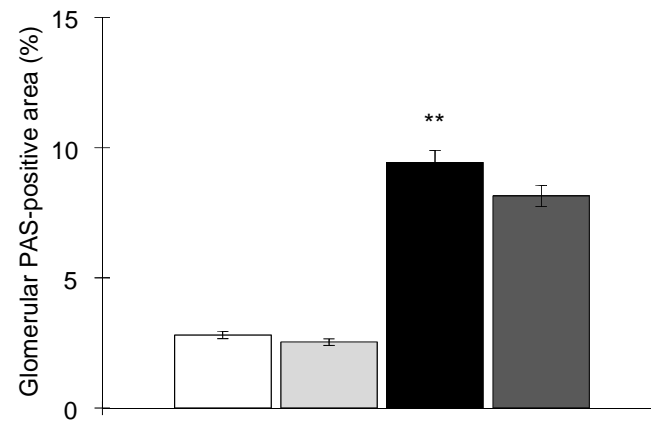

**ESM Fig. 5.** Proteinuria and plasma creatinine levels were determined, and renal structural changes evaluated by examining periodic acid-Schiff (PAS) staining. **a**, OLETF rats show increased urine protein excretion compared with LETO rats which is reduced by RDX. However, plasma creatinine concentration was not significantly altered between groups (**b**). **c**, Representative micrographs of PAS-stained renal sections (scale bar shows the values), and the PAS-positive area within the total glomerular area (**d**). OLETF rats show increased PAS-positive area and glomerular hypertrophy compared with LETO rats. RDX does not significantly affect these parameters. \*\* $p < 0.01$ , \*\*\* $p < 0.005$  LETO vs. OLETF; † $p < 0.05$  OLETF vs. OLETF+RDX. Scale bar represent 50  $\mu\text{m}$ . White bars represent LETO group. Black bars represent OLETF group. Light grey bar represent LETO+RDX. Dark grey bar represent OLETF+RDX.
