# Supplementary material for: Role of the renal sympathetic nerve in renal glucose metabolism during the development of type 2 diabetes in rats
Source: PubMed Central journal article supplement (PMC4630257; doi:10.1007/s00125-015-3771-9), 2015-10-08
Supplement: 125_2015_3771_MOESM8_ESM.pdf [file 125_2015_3771_MOESM8_ESM.pdf]

**ESM Fig. 6.**

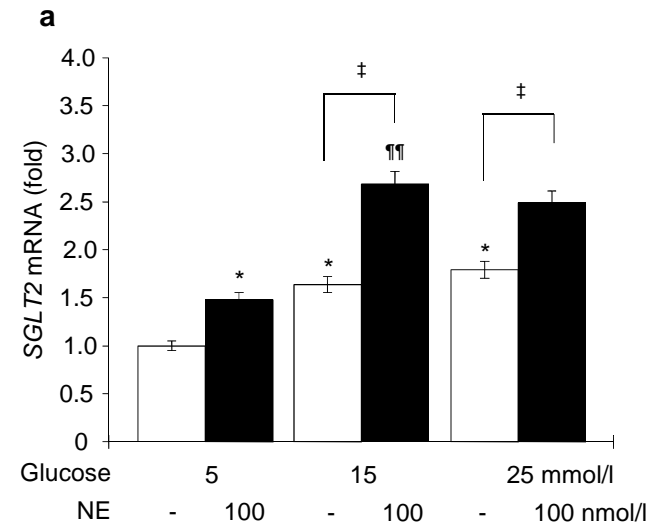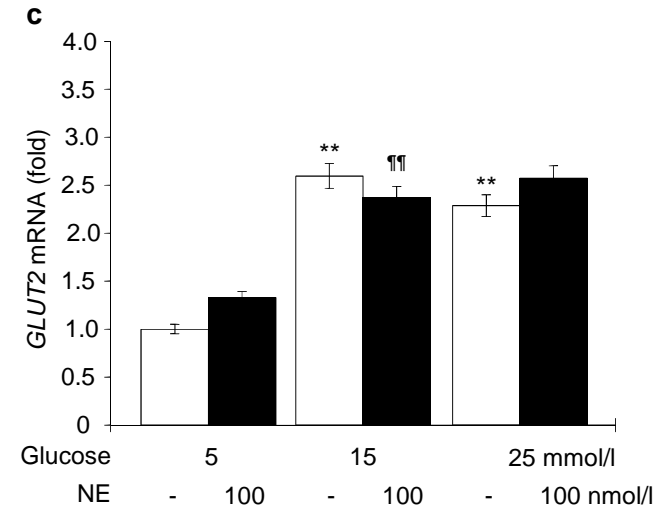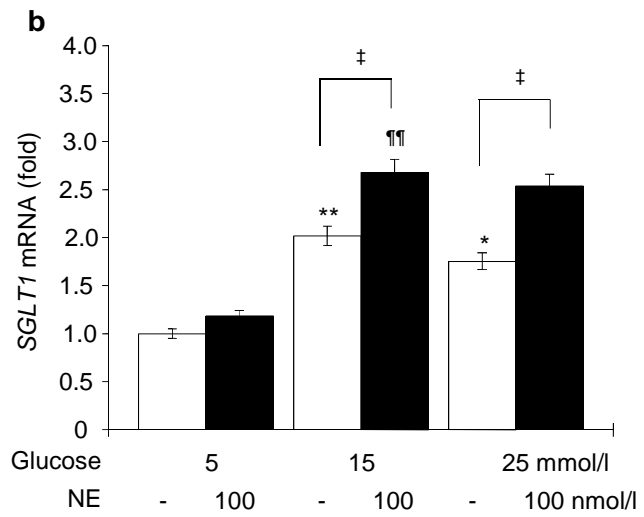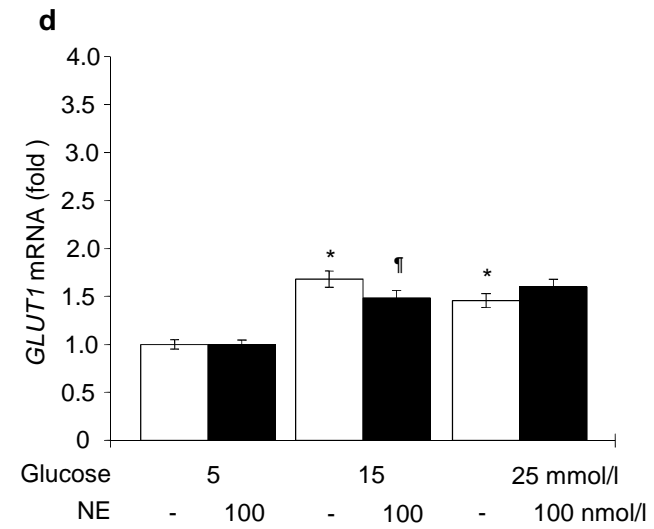

**ESM Fig. 6.** Effects of high glucose and norepinephrine (NE) on glucose transporter gene expression in human kidney proximal tubule epithelial cells (HK2). **a**, Treatment with high glucose for 24 hours upregulated *SGLT2* mRNA expression, which was further enhanced by exposure to NE. **b**, *GLUT2* mRNA expression was also upregulated by high glucose treatment, however the addition of NE for 24 h did not significantly alter such values. **c**, Treatment with high glucose for 24 h upregulated *SGLT1* mRNA expression, which was further enhanced by exposure to NE. **d**, *GLUT1* mRNA expression tended to be upregulated by high glucose treatment. However, the addition of NE for 24 h did not significantly alter these values. Data are expressed as the relative difference in expression compared with 5 mmol/l glucose after normalization for  $\beta$ -actin expression. \* $p < 0.05$ , \*\* $p < 0.01$  vs. 5 mmol/l glucose; † $p < 0.05$ , †† $p < 0.01$  vs. 5 mmol/l glucose+NE. ‡ $p < 0.05$ .
