# Supplementary material for: Role of the renal sympathetic nerve in renal glucose metabolism during the development of type 2 diabetes in rats
Source: PubMed Central journal article supplement (PMC4630257; doi:10.1007/s00125-015-3771-9), 2015-10-08
Supplement: 125_2015_3771_MOESM11_ESM.pdf [file 125_2015_3771_MOESM11_ESM.pdf]

**ESM Table 3.** the expression of *Glut4* in skeletal muscle at the diabetic stage (protocol-1) and at the pre-diabetic stage (protocol-2).

|                    | Diabetic stage<br>(at 46 weeks of age)<br>(fold changes) | Pre-diabetic stage<br>(at 21 weeks of age)<br>(fold changes) |
|--------------------|----------------------------------------------------------|--------------------------------------------------------------|
| LETO (n = 8)       | 1.00±0.40                                                | 1.00±0.3                                                     |
| LETO + RDX (n = 8) | 1.01±0.27                                                | 1.03±0.25                                                    |
| OETF(n = 8)        | 0.62±0.11 <sup>††</sup>                                  | 0.70±0.18 <sup>†</sup>                                       |
| OETF + RDX (n = 8) | 0.95±0.04 <sup>††</sup>                                  | 0.91±0.09 <sup>†</sup>                                       |

Data are means±SEM. <sup>†</sup>*P* < 0.05, <sup>††</sup>*P* < 0.01 LETO vs. OETF; <sup>†</sup>*P* < 0.05, <sup>††</sup>*P* < 0.01 OETF vs. OETF + RDX. *Glut4*, glucose transporter 4.
